# Supplementary material for: The Challenges and Strategies towards Healthy Eating during COVID-19 Home Confinement Period among Working Adults with BMI ≥ 25 kg/m2 Enrolled in a Weight Loss Program: Qualitative Findings
Source: Int J Environ Res Public Health. 2022 May 30;19(11):6656. doi: 10.3390/ijerph19116656 (PMC9180068; doi:10.3390/ijerph19116656)
Supplement: Supplementary file 1 [file ijerph-19-06656-s001.zip › ijerph-1697389-supplementary.pdf]

| Supplementary Materials File S1:<br>COREQ checklist<br>Domain 1: Research team and reflexivity                                                                |                                                                                                                                                                                                                                                               | Location in the manuscript (section, page no.) |
|---------------------------------------------------------------------------------------------------------------------------------------------------------------|---------------------------------------------------------------------------------------------------------------------------------------------------------------------------------------------------------------------------------------------------------------|------------------------------------------------|
| <b>Personal characteristics</b>                                                                                                                               |                                                                                                                                                                                                                                                               |                                                |
| 1. Interviewer/facilitator<br><br>Which author/s conducted the interview or focus group?                                                                      | Siti Munirah Abdul Basir (SMAB)                                                                                                                                                                                                                               |                                                |
| 2. Credentials<br><br>What were the researchers' credentials? E.g. PhD, MD                                                                                    | MHSc, PhD                                                                                                                                                                                                                                                     | Title page - 1                                 |
| 3. Occupation<br><br>What was their occupation at the time of study?                                                                                          | Researcher and lecturer                                                                                                                                                                                                                                       |                                                |
| 4. Gender<br><br>Was the researcher male or female?                                                                                                           | Female                                                                                                                                                                                                                                                        |                                                |
| 5. Experience and training<br><br>What experience or training does the researcher have?                                                                       | The researcher (SMAB) was in the middle of completing her Ph.D. where principles of qualitative research were covered in detail under experienced qualitative researcher (NMN) supervision.                                                                   | Methods – page 6 & 7                           |
| <b>Relationship with participants</b>                                                                                                                         |                                                                                                                                                                                                                                                               |                                                |
| 6. Relationship established<br><br>Was a relationship established prior to study commencement?                                                                | Yes                                                                                                                                                                                                                                                           | Methods – page 7                               |
| 7. Participant knowledge of the interviewer.<br><br>What did the participants know about the researcher? E.g. personal goals, reasons for doing the research. | Participants were briefed on the purpose of the study and understood that it was a research project for the researcher (SMAB). Ethical approval had been granted, and participants had given their verbal consent on top of their written consent for joining | Methods – page 5                               |

|                                                                                                                                                                                                                  |                                                                                               |                  |
|------------------------------------------------------------------------------------------------------------------------------------------------------------------------------------------------------------------|-----------------------------------------------------------------------------------------------|------------------|
|                                                                                                                                                                                                                  | our weight management program.                                                                |                  |
| <p>8. Interviewer characteristics</p> <p>What characteristics were reported about the interviewer/facilitator? E.g. bias, assumptions, reasons, and interest in the research topic.</p>                          | Researcher (SMAB) is a full time PhD student. No other interviewer-related biases identified. | Methods -        |
| <b>Domain 2: study design</b>                                                                                                                                                                                    |                                                                                               |                  |
| <b>Theoretical framework</b>                                                                                                                                                                                     |                                                                                               |                  |
| <p>9. Methodological orientation and theory</p> <p>What methodological orientation was stated to underpin the study? E.g. grounded theory, discourse analysis, ethnography, phenomenology, content analysis.</p> | Thematic content analysis.                                                                    | Methods – page 6 |
| <b>Participant selection</b>                                                                                                                                                                                     |                                                                                               |                  |
| <p>10. Sampling</p> <p>How were the participants selected? E.g. purposive, convenience, consecutive, snowball.</p>                                                                                               | Participants derived from the recent study, purposive sampling.                               | Methods – page 5 |
| <p>11. Method of approach</p> <p>How were the participants approached? E.g. e.g. face-to-face, telephone, mail, email.</p>                                                                                       | Telephone                                                                                     | Methods – page 5 |
| <p>12. Sample size</p> <p>How many participants were in the study?</p>                                                                                                                                           | Eleven                                                                                        | Methods – page 4 |
| <p>13. Non-participation</p> <p>How many people refused to participate or dropped out? Reason?</p>                                                                                                               | None                                                                                          |                  |
| <b>Setting</b>                                                                                                                                                                                                   |                                                                                               |                  |
| <p>14. Setting of data collection</p> <p>Where was the data collected? E.g. home, clinic, workplace.</p>                                                                                                         | Data were collected at home via phone calls.                                                  | Methods – page 5 |
| <p>15. Presence of non-participants</p>                                                                                                                                                                          | No.                                                                                           |                  |

|                                                                   |  |  |
|-------------------------------------------------------------------|--|--|
| Was anyone else present besides the participants and researchers? |  |  |
|-------------------------------------------------------------------|--|--|

|                                                                                                                    |                                                                                                          |                  |
|--------------------------------------------------------------------------------------------------------------------|----------------------------------------------------------------------------------------------------------|------------------|
| 16. Description of sample<br><br>What are the important characteristics of the sample? E.g. demographic data, age. | Participated in our weight management program and working from home during Movement Control Order (MCO). | Methods – page 4 |
| <b>Data collection</b>                                                                                             |                                                                                                          |                  |
| 17. Interview guide<br><br>Were questions, prompts, guides provided by the authors? Was it pilot-tested?           | Interviews were semi-structured and follow-up questions were allowed.                                    | Table 1 – page 6 |
| 18. Repeat interviews<br><br>Were repeat interviews carried out? If yes, how many?                                 | No.                                                                                                      |                  |
| 19. Audio/visual recording<br><br>Did the research use audio or visual recording to collect the data?              | Yes, interviews were audio-recorded.                                                                     | Methods – page 5 |
| 20. Field notes<br><br>Were field notes made during and/or after the interview or focus group?                     | Yes.                                                                                                     | Methods - Page 5 |
| 21. Duration<br><br>What was the duration of the interviews or focus group?                                        | 40-60 minutes                                                                                            | Methods – page 5 |
| 22. Data saturation<br><br>Was data saturation discussed?                                                          | Yes                                                                                                      | Methods – page 6 |
| 23. Transcripts returned<br><br>Were transcripts returned to participants for comment and/or correction?           | No.                                                                                                      |                  |

| <b>Domain 3: analysis and findings</b>                                                                                                                           |                                                                                                                                       |                            |
|------------------------------------------------------------------------------------------------------------------------------------------------------------------|---------------------------------------------------------------------------------------------------------------------------------------|----------------------------|
| 24. Number of data coders<br><br>How many data coders coded the data?                                                                                            | Three                                                                                                                                 | Methods –<br>page 6        |
| 25. Description of the coding tree.<br><br>Did author provide a description of the coding tree?                                                                  | Yes                                                                                                                                   | Methods –<br>page 6        |
| 26. Derivation of themes<br><br>Were themes identified in advance or derived from the data?                                                                      | Themes were derived from the data.                                                                                                    | Methods                    |
| 27. Software<br><br>What software, if applicable, was used to manage the data?                                                                                   | NVivo 12 plus                                                                                                                         | Methods –<br>page 6        |
| 28. Participant checking<br><br>Did participants provide feedback on the findings?                                                                               | No.                                                                                                                                   |                            |
| <b>Reporting</b>                                                                                                                                                 |                                                                                                                                       |                            |
| 29. Quotations presented<br><br>Were participant quotations presented to illustrate the themes/findings? Was each quotation identified? E.g. participant number. | Yes, specific comments were supported with direct quotes attributed to an anonymized participant by their age and occupational group. | Results –<br>Table 3 – 5   |
| 30. Data and findings consistent<br><br>Was there consistency between the data presented and the findings?                                                       | Yes                                                                                                                                   | Discussion –<br>page 14-18 |
| 31. Clarity of major themes<br><br>Were major themes clearly presented in the findings?                                                                          | Yes                                                                                                                                   | Results –<br>Table 3-5     |

|                                                                        |     |  |
|------------------------------------------------------------------------|-----|--|
| 32. Clarity of minor themes                                            |     |  |
| Is there a description of diverse cases or discussion of minor themes? | No. |  |
